# Supplementary material for: High-to-Low CO2 Acclimation Reveals Plasticity of the Photorespiratory Pathway and Indicates Regulatory Links to Cellular Metabolism of Arabidopsis
Source: PLoS One. 2012 Aug 17;7(8):e42809. doi: 10.1371/journal.pone.0042809 (PMC3422345; doi:10.1371/journal.pone.0042809)
Supplement: Table S1 — Metabolic response of Arabidopsis wild type after transition to ambient air. (XLSX) [file pone.0042809.s004.xlsx]

## Sheet: Table S1
Table S1. Metabolic response of Arabidopsis wild type after transition to ambient air.
Plants were grown in 1% CO2 (HC) with a 10/14 h day/night cycle. After reaching growth stadium 5.1, CO2 was reduced to ambient air levels (LC). Fully expanded leaves were harvested before (HC control) and after HC-to-LC transition (LC; 1, 3, and 5 days), 2 h before (day) and 4 h after (night) light was switched off. Ratios of mean relative metabolite contents ± SD (n = 3) are shown, where the val…
Wild-type leaf metabolite contents (normalized to the HC sample)
	HC±SD		LC±SD (1 day)		LC±SD (3 days)		LC±SD (5 days)
Metabolite	day	night	day	night	day	night	day	night
Ala	1.00±0.41	1.00±0.48	0.13±0.06	1.58±0.45	0.05±0.001	0.31±0.11	0.07±0.01	0.19±0.01
Arg	1.00±0.25	1.00±0.34	0.62±0.12	0.61±0.11	0.55±0.27	0.69±0.19	0.26±0.03	0.97±0.22
Asn	1.00±0.06	1.00±0.27	1.92±0.30	0.44±0.01	0.62±0.14	0.37±0.11	0.64±0.11	1.40±0.51
Asp	1.00±0.18	1.00±0.34	0.79±0.04	0.79±0.04	0.60±0.17	0.90±0.35	0.34±0.02	0.61±0.14
GABA	1.00±0.16	1.00±0.08	1.42±0.34	1.12±0.11	0.82±0.27	1.32±0.43	1.22±0.24	1.14±0.06
Citrate	1.00±0.15	1.00±0.39	1.79±0.07	0.44±0.07	1.20±0.37	0.31±0.08	0.56±0.17	0.31±0.14
Dehydroascorbate	1.00±0.28	1.00±0.44	8.45±0.67	0.47±0.20	5.13±2.29	0.62±0.10	2.28±0.24	1.24±0.28
Ethanolamine	1.00±0.08	1.00±0.15	1.12±0.04	0.71±0.06	0.86±0.17	0.75±0.14	0.67±0.03	0.71±0.07
Fructose	1.00±0.21	1.00±0.47	0.69±0.08	0.27±0.09	0.41±0.16	0.05±0.01	1.38±0.12	0.09±0.02
Fumarate	1.00±0.22	1.00±0.14	1.09±0.13	0.67±0.07	0.95±0.25	0.60±0.09	0.44±0.03	0.55±0.09
Galactinol	1.00±0.72	1.00±0.39	3.38±0.01	0.69±0.27	2.33±0.87	0.14±0.02	0.35±0.03	0.82±0.20
Glucose	1.00±0.31	1.00±0.37	1.08±0.41	0.47±0.14	1.11±0.41	0.10±0.02	0.62±0.19	0.22±0.06
Glu	1.00±0.15	1.00±0.27	2.07±0.12	0.71±0.03	0.77±0.24	0.80±0.25	0.55±0.03	0.63±0.19
Glutamine	1.00±0.02	1.00±0.11	0.72±0.05	0.48±0.07	0.48±0.09	0.45±0.10	0.54±0.09	0.97±0.17
α-Ketoglutarate	1.00±0.12	1.00±0.34	2.05±0.21	0.50±0.16	1.14±0.48	0.78±0.45	1.14±0.26	1.07±0.26
Glycerate	1.00±0.07	1.00±0.19	3.39±0.03	2.42±0.26	1.79±0.44	1.58±0.67	1.16±0.19	1.54±0.32
Glycerol	1.00±0.30	1.00±0.25	0.98±0.03	0.78±0.20	1.24±0.33	0.73±0.14	0.72±0.20	0.60±0.12
Gly	1.00±0.21	1.00±0.45	2.52±0.20	0.58±0.16	2.89±0.89	0.70±0.05	3.39±0.59	1.12±0.18
Glycolate	1.00±0.05	1.00±0.15	0.24±0.03	1.15±0.15	0.30±0.11	1.32±0.23	0.62±0.02	1.68±0.21
Guanidine	1.00±0.49	1.00±0.20	0.47±0.04	1.99±0.48	0.55±0.27	0.03±0.01	0.01±0.003	0.02±0.002
Hydroxypyruvate	1.00±0.21	1.00±0.43	1.08±0.14	0.64±0.22	0.27±0.02	0.26±0.08	0.36±0.04	0.23±0.01
Inositol	1.00±0.30	1.00±0.09	1.51±0.12	0.85±0.04	0.59±0.18	0.88±0.22	0.77±0.04	1.00±0.10
Ile	1.00±0.07	1.00±0.07	2.55±0.64	1.45±0.15	2.24±0.16	1.65±0.60	0.63±0.06	1.36±0.26
Lys	1.00±0.28	1.00±0.47	7.96±0.97	0.36±0.07	1.30±0.27	0.57±0.22	1.43±0.23	0.63±0.18
Malate	1.00±0.19	1.00±0.24	1.14±0.15	0.50±0.03	0.96±0.24	0.33±0.11	0.71±0.23	0.57±0.25
Maltose	1.00±0.33	1.00±0.25	1.23±0.19	0.96±0.20	0.90±0.18	0.75±0.14	0.87±0.14	0.98±0.37
Methionine	1.00±0.33	1.00±0.22	1.70±0.56	0.95±0.26	0.48±0.17	0.95±0.33	0.84±0.06	1.16±0.20
Nicotinic acid	1.00±0.27	1.00±0.22	1.33±0.22	0.93±0.10	1.14±0.50	0.98±0.15	0.64±0.13	1.23±0.47
Ornithine	1.00±0.16	1.00±0.08	1.40±0.19	1.17±0.04	0.55±0.18	1.14±0.34	0.45±0.09	2.12±0.65
PhenylAla	1.00±0.24	1.00±0.08	0.84±0.17	1.62±0.02	0.60±0.30	1.30±0.46	0.65±0.10	1.63±0.30
Proline	1.00±0.38	1.00±0.47	2.05±0.58	2.26±1.08	1.52±0.57	0.27±0.11	1.55±0.62	1.26±0.94
Putrescine	1.00±0.24	1.00±0.32	0.42±0.04	1.00±0.22	0.79±0.33	0.32±0.04	1.07±0.33	0.80±0.17
PyroGlu	1.00±0.23	1.00±0.20	0.94±0.21	0.74±0.10	0.61±0.16	0.94±0.30	0.50±0.10	1.52±0.75
Pyruvate	1.00±0.17	1.00±0.12	1.17±0.31	0.78±0.15	0.66±0.26	1.22±0.47	1.26±0.27	1.68±0.49
Raffinose	1.00±0.70	1.00±0.44	1.96±0.12	0.40±0.08	2.35±0.46	0.69±0.53	0.61±0.08	0.63±0.27
Rhamnose	1.00±0.11	1.00±0.14	2.04±0.04	1.00±0.12	1.33±0.30	1.40±0.58	1.32±0.12	1.44±0.35
Ser	1.00±0.20	1.00±0.19	2.22±0.34	1.50±0.44	1.47±0.27	0.79±0.35	1.49±0.15	0.70±0.05
Ser, N-acetyl	1.00±0.11	1.00±0.03	1.78±0.38	0.88±0.07	3.04±1.07	2.04±0.55	1.74±0.28	1.33±0.32
Ser, O-acetyl	1.00±0.24	1.00±0.07	0.97±0.33	1.03±0.17	0.40±0.14	0.54±0.12	0.54±0.08	0.68±0.10
Succinate	1.00±0.06	1.00±0.16	1.85±0.14	0.80±0.17	0.98±0.38	0.52±0.09	0.91±0.41	0.75±0.33
Sucrose	1.00±0.14	1.00±0.14	0.95±0.07	0.69±0.02	0.81±0.15	0.65±0.14	0.58±0.02	0.75±0.07
Threitol	1.00±0.38	1.00±0.43	2.78±1.11	0.74±0.30	0.91±0.20	1.66±0.76	2.58±0.25	1.33±0.47
Threonic acid	1.00±0.23	1.00±0.09	0.97±0.08	0.93±0.14	1.06±0.18	0.98±0.08	0.62±0.16	1.54±0.73
Threonine	1.00±0.14	1.00±0.19	1.19±0.20	1.07±0.19	1.05±0.23	1.68±0.37	0.86±0.12	1.99±0.36
Trehalose	1.00±0.47	1.00±0.04	1.29±0.25	0.82±0.11	1.04±0.34	0.66±0.01	1.08±0.35	1.46±0.48
Tryptophan	1.00±0.27	1.00±0.13	2.33±0.71	0.96±0.28	0.41±0.06	0.29±0.13	0.47±0.07	0.79±0.23
Tyr	1.00±0.24	1.00±0.17	1.69±0.40	1.24±0.14	0.61±0.24	2.35±1.01	0.67±0.08	1.58±0.26
Val	1.00±0.03	1.00±0.05	1.82±0.35	1.37±0.09	0.66±0.23	1.16±0.21	0.76±0.10	1.23±0.16
