# Supplementary material for: High-to-Low CO2 Acclimation Reveals Plasticity of the Photorespiratory Pathway and Indicates Regulatory Links to Cellular Metabolism of Arabidopsis
Source: PLoS One. 2012 Aug 17;7(8):e42809. doi: 10.1371/journal.pone.0042809 (PMC3422345; doi:10.1371/journal.pone.0042809)
Supplement: Table S2 — Metabolic response of hpr1 after transition to ambient air. (XLSX) [file pone.0042809.s005.xlsx]

## Sheet: Tabelle1
Table S2. Metabolic response of hpr1 after transition to ambient air.
Plants were grown and harvested as described in the legend to Table S1. Mutant-to-wild-type ratios of mean relative metabolite contents ± SD (n = 3) are shown, where the values from the wild-type HC samples were arbitrarily set to 1 (compare Table S1). Values highlighted in grey were used for Figure 7. Values in bold are significantly different from the corresponding wild-type sample according to…
hpr1 leaf metabolite contents (normalized to the wild-type HC sample)
	HC±SD		LC±SD (1 day)		LC±SD (3 days)		LC±SD (5 days)
Metabolite	day	night	day	night	day	night	day	night
Ala	0.36±0.09	0.78±0.17	0.06±0.02	1.55±0.68	0.26±0.12	1.77±0.53	0.25±0.10	2.01±0.52
Arg	0.86±0.22	1.34±0.36	0.99±0.30	1.71±0.42	0.61±0.24	1.18±0.20	0.96±0.33	1.46±0.14
Asn	1.04±0.10	0.50±0.10	1.05±0.29	0.82±0.36	1.19±0.43	0.69±0.09	1.04±0.12	0.78±0.15
Asp	0.95±0.12	0.88±0.10	0.29±0.05	0.77±0.24	0.39±0.09	0.70±0.16	0.48±0.07	0.58±0.07
GABA	1.17±0.45	0.38±0.06	0.87±0.21	1.45±0.29	1.00±0.19	0.62±0.03	1.47±0.23	1.32±0.41
Citrate	0.88±0.14	0.34±0.05	1.91±0.56	0.53±0.18	1.11±0.18	0.38±0.09	1.08±0.15	0.33±0.09
Dehydroascorbate	3.17±1.20	0.60±1.25	1.66±0.49	1.24±0.55	3.46±1.56	1.08±0.32	4.19±0.88	1.09±0.27
Ethanolamine	0.96±0.06	0.71±0.03	1.38±0.04	0.98±0.14	1.49±0.40	0.88±0.10	1.60±0.13	1.03±0.18
Fructose	1.04±0.11	0.17±0.02	1.38±0.04	0.40±0.03	0.71±0.30	0.26±0.12	0.44±0.05	0.07±0.001
Fumarate	0.87±0.04	0.67±0.03	1.12±0.14	0.77±0.13	0.84±0.06	0.68±0.07	0.84±0.09	0.66±0.09
Galactinol	0.30±0.11	0.10±0.03	0.70±0.55	0.44±0.25	0.15±0.02	0.34±0.11	0.08±0.03	0.37±0.22
Glucose	0.94±0.24	0.17±0.01	1.34±0.44	0.82±0.40	0.63±0.24	0.45±0.18	0.70±0.28	0.15±0.02
Glu	0.94±0.07	0.87±0.20	2.40±0.40	0.78±0.23	1.46±0.31	0.68±0.13	1.18±0.16	0.65±0.08
Glutamine	0.92±0.11	0.82±0.09	0.49±0.09	0.76±0.20	0.52±0.19	0.61±0.06	0.66±0.04	0.63±0.10
α-Ketoglutarate	0.83±0.27	0.65±0.26	4.27±0.66	1.60±0.60	3.11±1.53	1.36±0.16	2.93±0.96	2.67±1.21
Glycerate	0.84±0.11	0.90±0.06	6.58±0.39	6.41±1.49	2.79±0.81	3.86±0.46	2.53±0.49	5.84±2.44
Glycerol	0.88±0.23	0.78±0.25	0.86±0.29	0.72±0.09	0.84±0.38	0.44±0.16	1.07±0.15	0.60±0.05
Gly	1.09±0.08	0.47±0.18	86.8±12.4	16.2±5.13	18.4±0.95	13.6±3.92	40.0±8.33	8.82±3.47
Glycolate	0.63±0.02	0.76±0.11	0.07±0.02	1.11±0.13	0.08±0.03	0.61±0.07	0.14±0.05	0.76±0.13
Guanidine	0.70±0.10	0.89±0.09	0.71±0.08	2.93±1.35	0.01±0.004	0.03±0.001	0.21±0.17	0.03±0.003
Hydroxypyruvate	0.66±0.23	0.61±0.24	0.89±0.29	0.69±0.25	1.63±0.66	1.25±0.49	1.43±0.61	1.30±0.59
Inositol	0.95±0.08	0.64±0.09	1.08±0.28	0.88±0.22	0.81±0.16	0.89±0.09	0.75±0.13	0.79±0.20
Ile	0.99±0.22	0.85±0.12	1.41±0.24	3.66±0.47	0.88±0.12	1.22±0.20	0.87±0.05	1.65±0.19
Lys	2.61±0.62	0.59±0.20	2.03±0.73	0.81±0.29	1.61±0.22	0.29±0.06	2.05±0.11	0.46±0.09
Malate	0.77±0.09	0.43±0.04	1.13±0.37	0.64±0.13	0.84±0.04	0.51±0.03	0.84±0.24	0.49±0.14
Maltose	0.79±0.02	1.20±0.10	0.85±0.24	1.06±0.23	0.71±0.14	0.89±0.13	0.83±0.11	1.24±0.35
Methionine	1.02±0.31	0.58±0.14	0.93±0.07	1.10±0.30	0.89±0.36	0.83±0.13	1.23±0.17	0.87±0.11
Nicotinic acid	1.16±0.19	0.98±0.10	1.35±0.18	1.42±0.39	0.96±0.07	1.00±0.21	1.01±0.16	0.93±0.13
Ornithine	0.88±0.10	1.01±0.22	0.62±0.06	2.20±0.42	0.54±0.17	1.33±0.10	0.73±0.06	1.40±0.25
PhenylAla	0.69±0.15	0.64±0.14	1.48±0.52	4.86±0.80	0.83±0.30	0.71±0.13	0.80±0.08	1.50±0.39
Proline	0.20±0.02	0.11±0.04	0.23±0.06	0.49±0.22	0.79±0.38	1.23±0.97	2.52±0.77	0.22±0.14
Putrescine	0.88±0.18	0.42±0.02	1.29±0.44	1.41±0.33	0.86±0.37	0.11±0.05	0.99±0.15	1.16±0.40
PyroGlu	0.75±0.05	0.97±0.04	1.04±0.18	0.95±0.24	0.93±0.32	0.91±0.23	0.91±0.21	0.84±0.06
Pyruvate	0.97±0.26	0.74±0.08	1.11±0.15	1.09±0.31	2.22±0.98	1.13±0.10	1.27±0.23	1.21±0.35
Raffinose	0.37±0.18	0.13±0.04	1.04±0.36	0.31±0.15	0.19±0.05	0.07±0.02	0.15±0.05	0.27±0.20
Rhamnose	0.99±0.26	0.81±0.17	1.26±0.43	1.91±0.68	1.06±0.23	1.30±0.31	1.19±0.11	1.50±0.47
Ser	1.30±0.05	0.58±0.12	9.31±0.67	9.62±1.27	6.51±0.56	7.78±0.60	6.60±0.48	7.40±1.01
Ser, N-acetyl	0.92±0.27	0.58±0.05	1.42±0.33	1.88±0.89	5.30±0.46	3.69±0.77	4.21±0.10	6.10±1.18
Ser, O-acetyl	0.63±0.06	0.80±0.06	1.05±0.11	1.41±0.23	0.49±0.04	1.16±0.10	0.89±0.14	1.22±0.25
Succinate	0.69±0.12	0.55±0.05	1.86±0.53	1.59±0.05	0.87±0.16	1.03±0.27	0.74±0.21	1.19±0.22
Sucrose	0.81±0.05	0.70±0.06	0.88±0.12	0.78±0.13	0.59±0.06	0.64±0.02	0.65±0.03	0.67±0.13
Threitol	0.56±0.26	0.19±0.03	0.72±0.25	0.53±0.09	0.59±0.04	0.63±0.03	1.99±0.55	1.11±0.52
Threonic acid	1.10±0.12	1.01±0.12	0.55±0.13	0.86±0.12	0.79±0.02	0.87±0.11	0.60±0.03	0.71±0.05
Threonine	0.90±0.06	1.10±0.18	1.07±0.14	1.64±0.18	1.93±0.65	2.59±0.51	2.47±0.21	2.93±0.41
Trehalose	0.77±0.18	0.44±0.03	0.70±0.19	1.06±0.38	0.57±0.23	0.77±0.17	0.77±0.36	0.55±0.04
Tryptophan	0.67±0.22	0.49±0.11	1.72±0.76	3.45±1.70	0.43±0.16	0.46±0.08	0.47±0.06	0.51±0.11
Tyr	0.81±0.36	0.51±0.10	0.53±0.007	3.28±0.71	0.62±0.10	0.85±0.10	0.57±0.02	1.38±0.37
Val	0.87±0.15	0.73±0.10	0.86±0.22	2.28±0.33	0.44±0.06	0.60±0.01	0.56±0.09	1.11±0.17
