# Supplementary material for: High-to-Low CO2 Acclimation Reveals Plasticity of the Photorespiratory Pathway and Indicates Regulatory Links to Cellular Metabolism of Arabidopsis
Source: PLoS One. 2012 Aug 17;7(8):e42809. doi: 10.1371/journal.pone.0042809 (PMC3422345; doi:10.1371/journal.pone.0042809)
Supplement: Table S3 — Metabolic response of pglp1 after transition to ambient air. (XLSX) [file pone.0042809.s006.xlsx]

## Sheet: Tabelle1
Table S3. Metabolic response of pglp1 after transition to ambient air.
Plants were grown and harvested as described in the legend to Table S1. Mutant-to-wild-type ratios of mean relative metabolite contents ± SD (n = 3) are shown, where the values from the wild-type HC samples were arbitrarily set to 1 (compare Table S1). Values highlighted in grey were used for Figure 8. Values in bold are significantly different from the corresponding wild-type sample according to…
pglp1 leaf metabolite contents (normalized to the wild-type HC sample)
	HC±SD		LC±SD (1 day)		LC±SD (3 days)		LC±SD (5 days)
Metabolite	day	night	day	night	day	night	day	night
Ala	9.15±1.84	23.1±4.9	3.20±0.65	6.70±0.75	0.17±0.03	7.67±5.12	0.14±0.02	1.25±0.21
Arg	2.36±0.17	6.04±1.49	8.35±1.36	100±43.9	31.18±13.93	34.88±11.51	38.7±12.3	119.9±19.0
Asn	2.51±0.31	1.22±0.16	6.10±0.57	7.29±1.85	11.97±2.43	8.51±3.68	17.3±3.52	22.27±8.63
Asp	0.45±0.04	0.69±0.06	0.14±0.02	0.69±0.12	0.40±0.10	0.52±0.09	0.66±0.13	0.71±0.11
GABA	5.44±1.40	3.14±0.88	8.43±1.74	10.75±1.54	9.21±1.52	7.74±3.33	10.9±2.11	8.79±2.21
Citrate	1.65±0.21	0.58±0.16	3.76±0.44	0.97±0.07	3.35±1.00	0.79±0.26	1.66±0.51	0.50±0.05
Dehydroascorbate	0.86±0.30	0.23±0.05	0.25±0.11	0.16±0.06	1.55±0.61	0.07±0.03	0.34±0.04	0.06±0.02
Ethanolamine	1.40±0.13	0.86±0.09	2.06±0.30	1.30±0.07	3.12±0.45	1.68±0.22	3.08±0.57	2.37±0.31
Fructose	3.04±1.01	1.08±0.06	0.28±0.04	0.24±0.04	0.38±0.11	0.51±0.21	1.29±0.58	1.93±0.74
Fumarate	0.37±0.04	0.14±0.02	0.12±0.01	0.10±0.02	0.24±0.003	0.11±0.02	0.29±0.09	0.26±0.04
Galactinol	0.16±0.03	0.11±0.05	0.05±0.01	0.05±0.01	0.04±0.01	0.04±0.01	0.03±0.01	0.01±0.005
Glucose	0.87±0.38	0.51±0.02	0.23±0.02	0.34±0.07	0.32±0.02	0.32±0.01	0.33±0.05	0.66±0.23
Glu	1.20±0.10	0.55±0.09	0.47±0.01	0.22±0.06	1.08±0.35	0.17±0.03	1.51±0.64	0.47±0.22
Glutamine	1.66±0.13	1.21±0.09	2.46±0.44	2.60±0.29	1.45±0.20	2.52±0.69	2.37±1.02	6.25±1.85
α-Ketoglutarate	0.54±0.14	0.15±0.02	0.27±0.05	0.25±0.07	1.18±0.14	4.03±1.30	0.31±0.09	0.63±0.16
Glycerate	1.99±0.17	1.94±0.32	2.29±0.45	5.10±0.79	7.18±1.42	4.03±1.30	1.54±0.30	5.07±0.70
Glycerol	1.07±0.34	0.97±0.06	2.10±0.17	1.11±0.29	1.95±0.36	1.03±0.27	1.03±0.22	1.08±0.03
Gly	18.51±4.0	13.1±0.64	31.4±4.06	11.2±1.59	11.23±1.84	13.64±6.48	16.9±7.62	12.78±2.43
Glycolate	4.47±0.24	9.72±2.19	2.31±0.14	2.34±0.41	1.08±0.09	3.30±1.58	0.86±0.18	3.15±1.50
Guanidine	0.53±0.12	0.40±0.19	0.17±0.02	0.74±0.30	0.40±0.36	2.21±1.79	0.05±0.01	0.14±0.04
Hydroxypyruvate	0.29±0.08	0.17±0.03	0.14±0.02	0.11±0.006	0.65±0.28	0.36±0.16	0.72±0.18	0.97±0.13
Inositol	0.83±0.12	0.38±0.01	0.68±0.08	0.41±0.03	0.67±0.20	0.40±0.10	0.66±0.04	0.47±0.11
Ile	3.60±0.56	5.04±1.15	13.2±0.91	37.84±9.89	20.47±3.60	42.42±12.22	34.9±76.0	116.6±20.8
Lys	0.55±0.04	0.42±0.19	0.27±0.09	10.28±4.76	71.98±17.27	5.44±2.69	71.9±12.3	18.16±3.21
Malate	0.26±0.05	0.10±0.02	0.12±0.03	0.09±0.02	0.29±0.05	0.11±0.03	0.44±0.13	0.27±0.04
Maltose	1.39±0.32	0.84±0.09	1.64±0.20	0.19±0.05	1.12±0.37	0.15±0.03	0.86±0.20	0.18±0.06
Methionine	3.58±1.00	2.13±0.29	4.20±0.52	14.85±6.19	8.94±0.49	18.43±4.59	20.6±7.93	74.56±19.61
Nicotinic acid	0.59±0.05	0.30±0.04	0.56±0.05	0.67±0.26	0.99±0.40	0.49±0.11	0.75±0.27	0.47±0.04
Ornithine	2.13±0.57	4.63±0.65	6.28±0.80	47.7±23.7	19.96±5.05	51.29±19.56	32.8±7.5	133.4±18.61
PhenylAla	2.79±0.55	3.86±0.42	4.28±0.23	16.8±6.08	8.77±1.67	15.29±3.52	11.4±1.01	79.6±10.72
Proline	1.03±0.42	0.19±0.06	0.44±0.02	0.28±0.04	0.79±0.37	0.42±0.12	0.90±0.30	1.00±0.28
Putrescine	1.00±0.15	1.80±0.15	4.04±1.15	4.92±1.95	3.89±0.59	2.67±0.89	1.90±0.49	5.82±2.71
PyroGlu	1.32±0.13	1.00±0.09	1.61±0.44	1.27±0.27	1.30±0.19	0.91±0.18	1.89±0.63	1.88±0.38
Pyruvate	1.24±0.22	0.66±0.10	0.77±0.05	0.84±0.25	0.95±0.08	1.06±0.19	0.83±0.18	0.72±0.21
Raffinose	0.26±0.08	0.17±0.03	0.10±0.01	0.02±0.006	0.04±0.007	0.009±0.001	0.02±0.01	0.01±0.001
Rhamnose	0.59±0.09	0.05±0.01	0.74±0.05	0.73±0.06	0.93±0.10	0.78±0.05	1.09±0.05	1.34±0.20
Ser	1.02±0.47	0.62±0.03	3.20±0.23	3.90±0.18	3.63±0.44	4.51±0.99	3.35±0.45	4.56±0.75
Ser, N-acetyl	0.88±0.18	0.46±0.06	1.30±0.14	1.26±0.12	6.81±1.95	6.00±2.39	11.5±3.95	10.20±1.87
Ser, O-acetyl	13.69±6.8	2.87±0.61	15.5±1.97	4.99±1.41	2.44±0.16	3.48±1.19	2.16±0.59	8.07±3.72
Succinate	8.18±1.17	5.17±0.83	5.43±1.12	3.45±0.53	5.15±0.81	5.46±1.69	7.53±2.74	4.24±0.70
Sucrose	0.92±0.05	0.80±0.08	1.03±0.11	0.71±0.03	0.99±0.10	0.80±0.13	0.87±0.07	0.72±0.11
Threitol	3.79±0.49	2.00±0.11	4.59±0.88	1.43±0.01	5.43±0.85	4.21±0.21	6.63±1.31	5.20±0.61
Threonic acid	0.57±0.06	0.47±0.10	0.42±0.07	0.38±0.02	0.37±0.15	0.36±0.04	0.36±0.09	0.42±0.11
Threonine	1.55±0.21	1.24±0.02	2.32±0.19	3.15±0.77	4.04±0.47	4.36±0.97	5.13±0.89	7.30±0.93
Trehalose	2.05±0.39	0.80±0.22	1.39±0.11	1.47±0.13	1.06±0.14	0.94±0.16	1.19±0.48	1.34±0.34
Tryptophan	2.60±0.84	2.46±0.36	4.03±0.44	8.29±2.57	7.24±1.88	4.60±0.05	7.81±0.78	36.09±9.53
Tyr	5.06±1.05	12.7±3.29	10.5±1.03	19.2±2.73	9.75±1.60	24.74±7.95	15.2±6.3	40.29±9.22
Val	3.12±0.43	2.98±0.36	5.98±0.48	14.1±3.00	10.48±1.33	16.22±3.65	15.2±5.8	38.62±6.91
